# Supplementary figures and images for: Impact of the COVID-19 Pandemic on the Management of Staphylococcus aureus Bloodstream Infections in a Tertiary Care Hospital
Source: MDPI journal article supplement (doi:10.3390/pathogens12040611), 2023-04-18

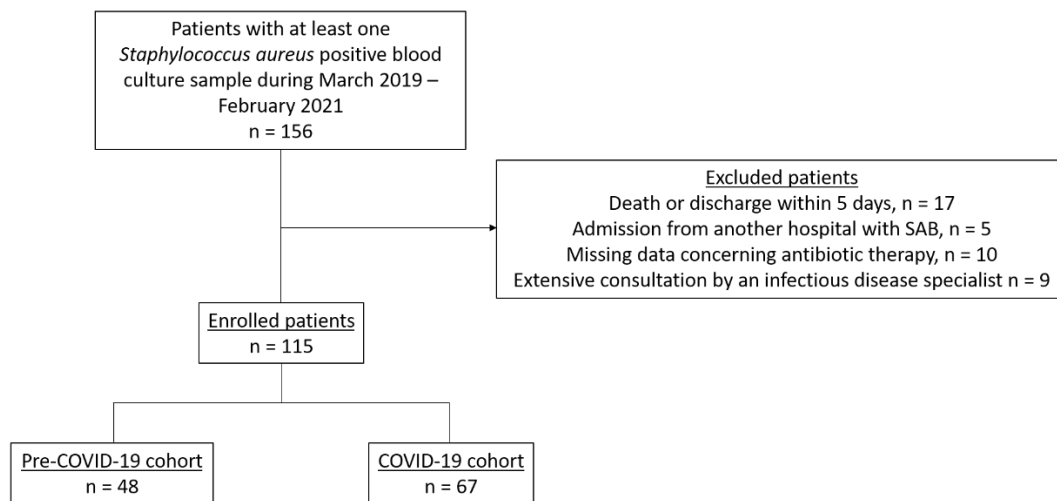

**Supplementary Figure S1.** SAB patients meeting the inclusion criteria

Supplement: s1 [file s1]
